# Supplementary material for: Novel P2-type Na2/3Ni1/6Mg1/6Ti2/3O2as an anode material for sodium-ion batteries
Source: Royal Society of Chemistry journal article supplement (doi:10.1039/c6cc09378g), 2017-01-01
Supplement: c6cc09378g1.pdf [file c6cc09378g1.pdf]

## Electronic Supplementary Information (ESI)

# Novel P2-type $\text{Na}_{2/3}\text{Ni}_{1/6}\text{Mg}_{1/6}\text{Ti}_{2/3}\text{O}_2$ as an anode material for sodium-ion batteries

Peng-Fei Wang,<sup>ab</sup> Hu-Rong Yao,<sup>ab</sup> Tong-Tong Zuo,<sup>ab</sup> Ya-Xia Yin,<sup>↑ab</sup> and Yu-Guo Guo<sup>↑ab</sup>

<sup>a</sup> CAS Key Laboratory of Molecular Nanostructure and Nanotechnology, and Beijing National Laboratory for Molecular Sciences, Institute of Chemistry, Chinese Academy of Sciences (CAS), Beijing 100190, P.R. China.

<sup>b</sup> School of Chemistry and Chemical Engineering, University of Chinese Academy of Sciences, Beijing 100049, P.R. China.

↑ To whom correspondence should be addressed. E-mail: [ygguo@iccas.ac.cn](mailto:ygguo@iccas.ac.cn); [yxyin@iccas.ac.cn](mailto:yxyin@iccas.ac.cn).

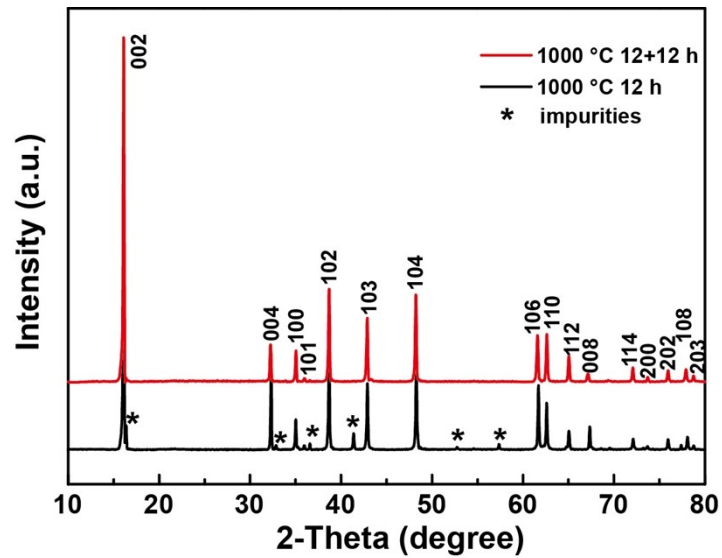

**Fig. S1** Powder X-ray diffraction pattern of P2-type  $\text{Na}_{2/3}\text{Ni}_{1/6}\text{Mg}_{1/6}\text{Ti}_{2/3}\text{O}_2$  samples.

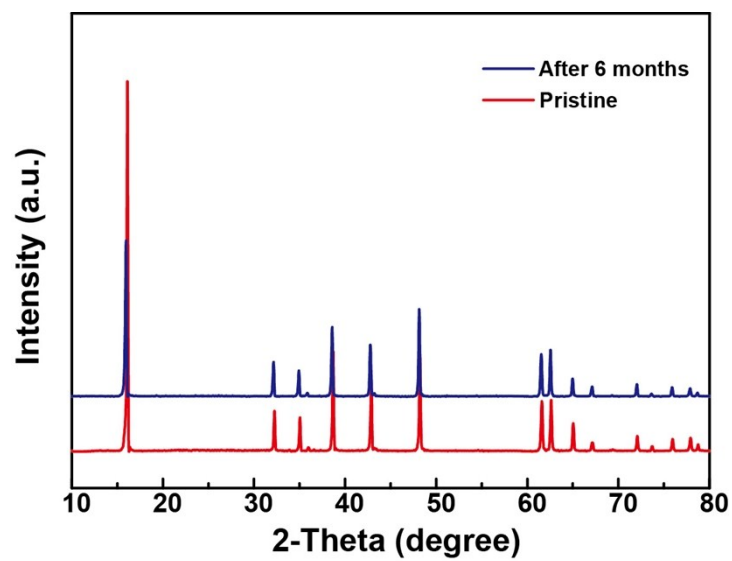

**Fig. S2** Powder X-ray diffraction pattern demonstrating structural stability of P2-type  $\text{Na}_{2/3}\text{Ni}_{1/6}\text{Mg}_{1/6}\text{Ti}_{2/3}\text{O}_2$  after different days on exposure to air.

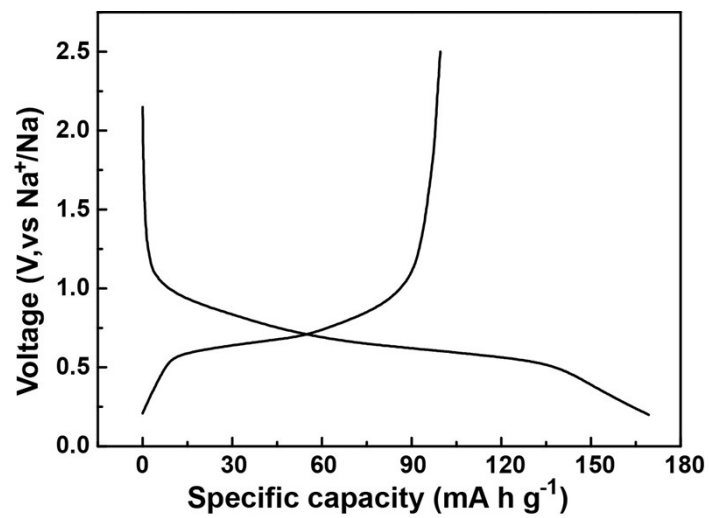

**Fig. S3** The first discharge/charge curves of P2-Na<sub>2/3</sub>Ni<sub>1/6</sub>Mg<sub>1/6</sub>Ti<sub>2/3</sub>O<sub>2</sub> electrodes cycled at a current rate of 0.1 C in the voltage range of 0.2-2.5 V.

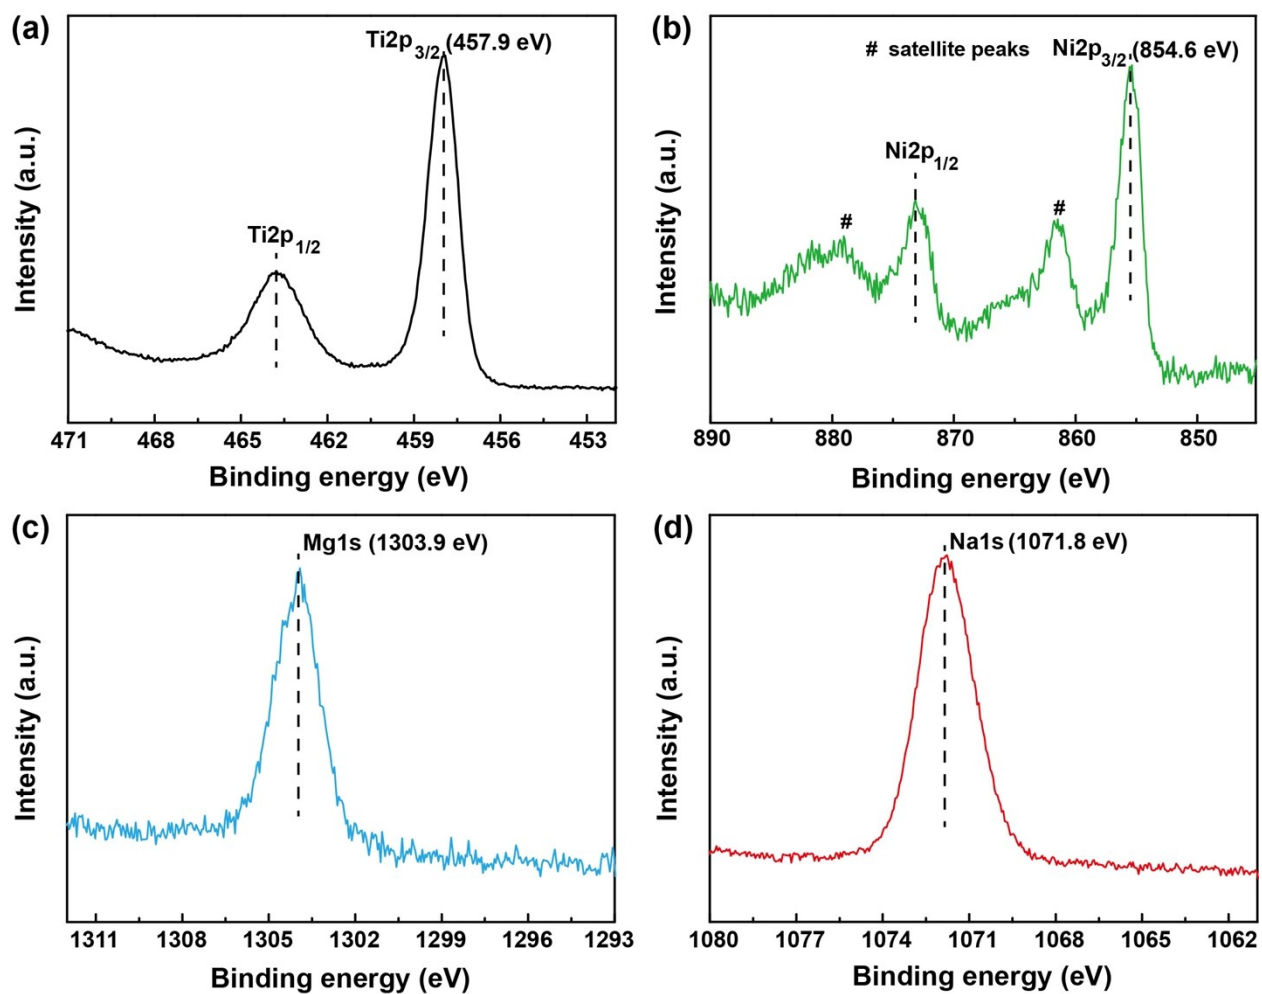

**Fig. S4** XPS spectra of P2- $\text{Na}_{2/3}\text{Ni}_{1/6}\text{Mg}_{1/6}\text{Ti}_{2/3}\text{O}_2$  for (a) Ti2p, (b) Ni2p, (c)Mg1s and (d) Na1s regions, indicating titanium, nickel, magnesium and sodium elements are in a valence state of +4, +2, +2 and +1, respectively.

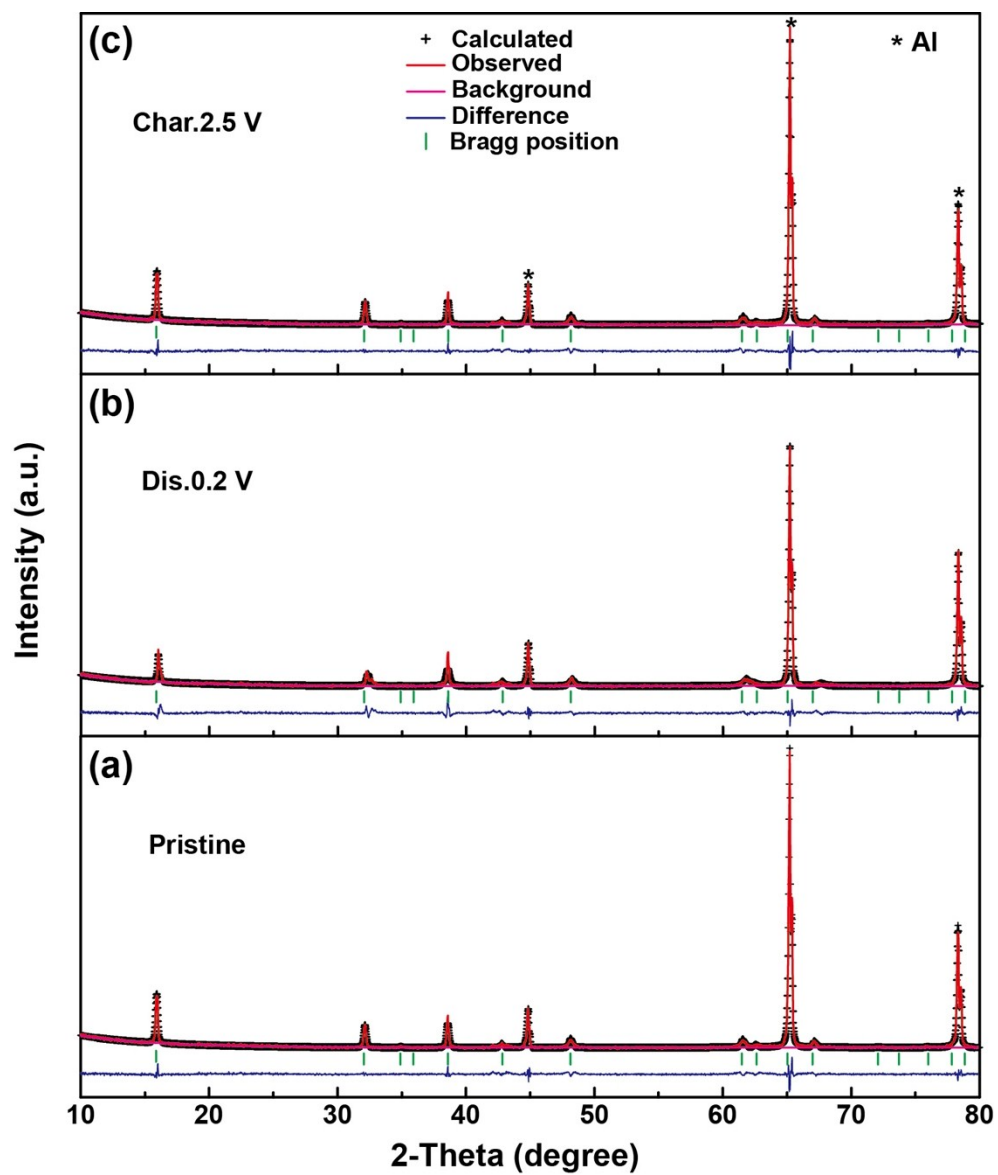

**Fig. S5** *In situ* XRD patterns and Rietveld refinement P2-Na<sub>2/3</sub>Ni<sub>1/6</sub>Mg<sub>1/6</sub>Ti<sub>2/3</sub>O<sub>2</sub> electrodes at different discharge/charge states during the first cycle.

**Table S1.** Crystallographic parameters of P2-Na<sub>2/3</sub>Ni<sub>1/6</sub>Mg<sub>1/6</sub>Ti<sub>2/3</sub>O<sub>2</sub> refined by the Rietveld method.

| <b>Atom</b>                                                                                                                          | <b>Site</b> | <b>x</b> | <b>y</b> | <b>z</b> | <b>Occ.</b> |
|--------------------------------------------------------------------------------------------------------------------------------------|-------------|----------|----------|----------|-------------|
| Na <sub>e</sub>                                                                                                                      | 2d          | 1/3      | 2/3      | 1/4      | 0.443       |
| Na <sub>f</sub>                                                                                                                      | 2b          | 0        | 0        | 1/4      | 0.227       |
| Ni                                                                                                                                   | 2a          | 0        | 0        | 0        | 0.167       |
| Mg                                                                                                                                   | 2a          | 0        | 0        | 0        | 0.166       |
| Ti                                                                                                                                   | 2a          | 0        | 0        | 0        | 0.667       |
| O                                                                                                                                    | 4f          | 2/3      | 1/3      | 0.0931   | 1.000       |
| P6 <sub>3</sub> /mmc   a = 2.9680(2) Å   c = 11.146(5) Å   V=85.036(6) Å <sup>3</sup> R <sub>p</sub> =5.7 %   R <sub>wp</sub> =7.5 % |             |          |          |          |             |

**Table S2:** Comparison of electrode performance of titanium-based P2-type anodes for sodium-ion batteries.

| <b>Materials</b>                                                                          | <b>Different element</b> | <b>Practical capacity (mA h g<sup>-1</sup>)</b> | <b>Cycling stability</b> | <b>Average voltage (V)</b> | <b>Reference</b> |
|-------------------------------------------------------------------------------------------|--------------------------|-------------------------------------------------|--------------------------|----------------------------|------------------|
| P2-Na <sub>2/3</sub> Ni <sub>1/3</sub> Ti <sub>2/3</sub> O <sub>2</sub>                   | Ni                       | 75 (0.05 C, 0.2-2.0 V)                          | 67% (25 cycles)          | 0.7                        | 29               |
| P2-Na <sub>0.66</sub> [Li <sub>0.22</sub> Ti <sub>0.78</sub> ]O <sub>2</sub>              | Li (expensive)           | 100 (0.1 C, 0.4-2.5 V)                          | 75% (1200 cycles)        | 0.75                       | 30               |
| P2-Na <sub>2/3</sub> Co <sub>1/3</sub> Ti <sub>2/3</sub> O <sub>2</sub>                   | Co (expensive)           | 90 (0.2 C, 0.15-2.5 V)                          | 84.84% (3000 cycles)     | 0.7                        | 31               |
| P2-Na <sub>0.6</sub> [Cr <sub>0.6</sub> Ti <sub>0.4</sub> ]O <sub>2</sub>                 | Cr (poisonous)           | 105 (0.1 C, 0.5-2.5 V)                          | 90.4% (200 cycles)       | 0.8                        | 32               |
| P2-Na <sub>2/3</sub> Ni <sub>1/6</sub> Mg <sub>1/6</sub> Ti <sub>2/3</sub> O <sub>2</sub> | Mg (cheap)               | 92 (0.1 C, 0.2-2.5 V)                           | 87.4% (100 cycles)       | 0.7                        | This work        |



**Table S3:** Crystal parameters refined by the Rietveld method on the *in situ* XRD patterns of pristine P2-Na<sub>2/3</sub>Ni<sub>1/6</sub>Mg<sub>1/6</sub>Ti<sub>2/3</sub>O<sub>2</sub> and electrochemically cycled samples.

|                          | <b>Pristine</b>                                                                        | <b>Discharged. 0.2 V</b>                                               | <b>Charged. 2.5 V</b>                                                                  |
|--------------------------|----------------------------------------------------------------------------------------|------------------------------------------------------------------------|----------------------------------------------------------------------------------------|
| Composition              | Na <sub>2/3</sub> Ni <sub>1/6</sub> Mg <sub>1/6</sub> Ti <sub>2/3</sub> O <sub>2</sub> | NaNi <sub>1/6</sub> Mg <sub>1/6</sub> Ti <sub>2/3</sub> O <sub>2</sub> | Na <sub>2/3</sub> Ni <sub>1/6</sub> Mg <sub>1/6</sub> Ti <sub>2/3</sub> O <sub>2</sub> |
| Space group              | P6 <sub>3</sub> /mmc                                                                   | P6 <sub>3</sub> /mmc                                                   | P6 <sub>3</sub> /mmc                                                                   |
| <b>Cell parameters</b>   |                                                                                        |                                                                        |                                                                                        |
| a [Å]                    | 2.9680(2)                                                                              | 2.9751(9)                                                              | 2.9691(9)                                                                              |
| c [Å]                    | 11.146(5)                                                                              | 11.134(3)                                                              | 11.149(8)                                                                              |
| V [Å <sup>3</sup> ]      | 85.036(6)                                                                              | 85.353(4)                                                              | 85.128(0)                                                                              |
| <b>Agreement factors</b> |                                                                                        |                                                                        |                                                                                        |
| R <sub>wp</sub>          | 7.5%                                                                                   | 8.9%                                                                   | 7.6%                                                                                   |
| R <sub>p</sub>           | 5.7%                                                                                   | 5.3%                                                                   | 5.4%                                                                                   |
